# Supplementary material for: In vitro and in vivo studies of triacetone triperoxide (TATP) metabolism in humans
Source: Springer Nature journal article supplement (doi:10.1007/s11419-020-00540-z), 2020-07-14
Supplement: MOESM1 [file 18181958]

# **In vitro and in vivo studies of triacetone triperoxide (TATP) metabolism in humans**

## **Supplementary Material**

Michelle Gonsalves<sup>1</sup>; Kevin Colizza<sup>1</sup>; James L. Smith<sup>1</sup>; Jimmie C. Oxley<sup>1\*</sup>

<sup>1</sup> Department of Chemistry, University of Rhode Island, 140 Flagg Rd, Kingston, RI 02881, USA.

\* Corresponding author:

Address: 140 Flagg Rd, Kingston, RI 02881, USA.

Phone number: 401- 874-2103

Email: [joxley@chm.uri.edu](mailto:joxley@chm.uri.edu)

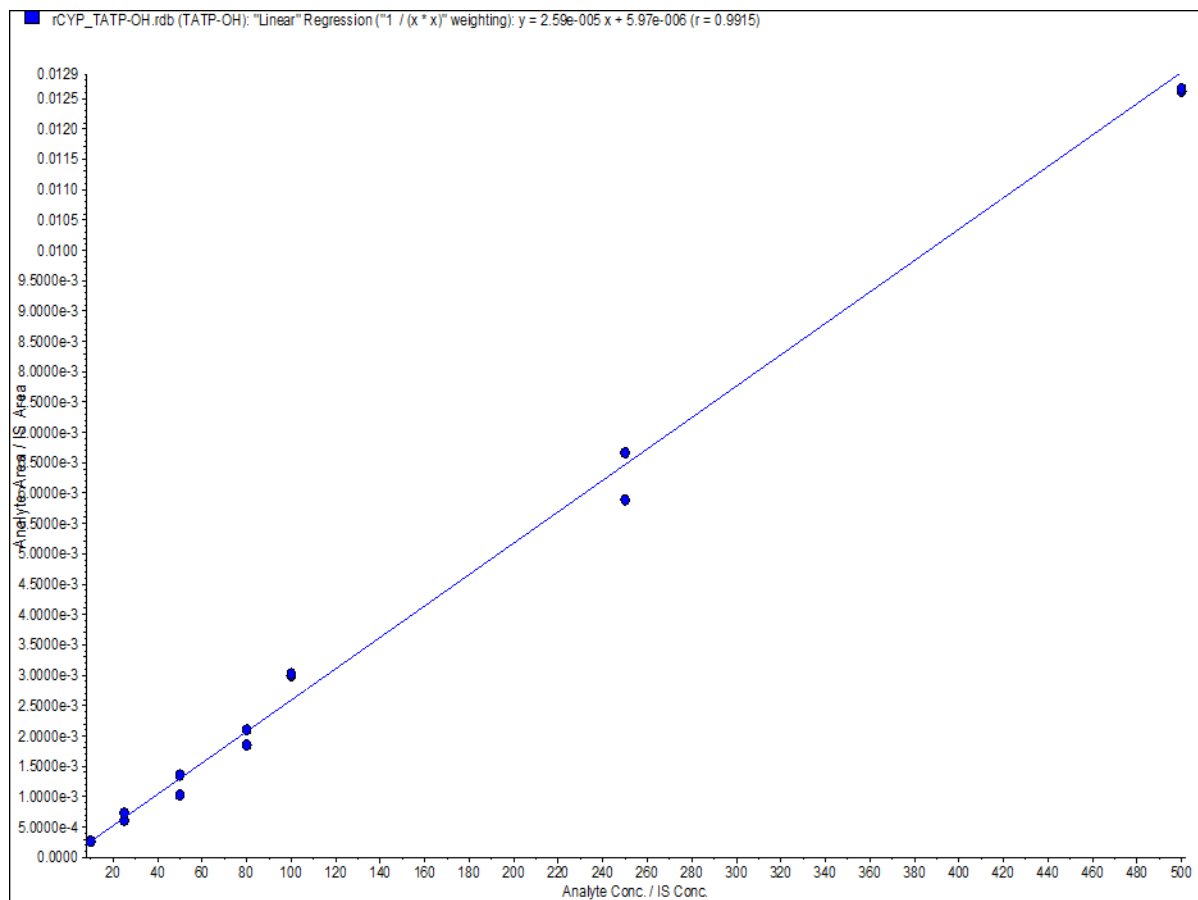

**Fig. S1** Hydroxy-triacetone triperoxide (TATP-OH) standard curve from 10 to 500 ng/mL

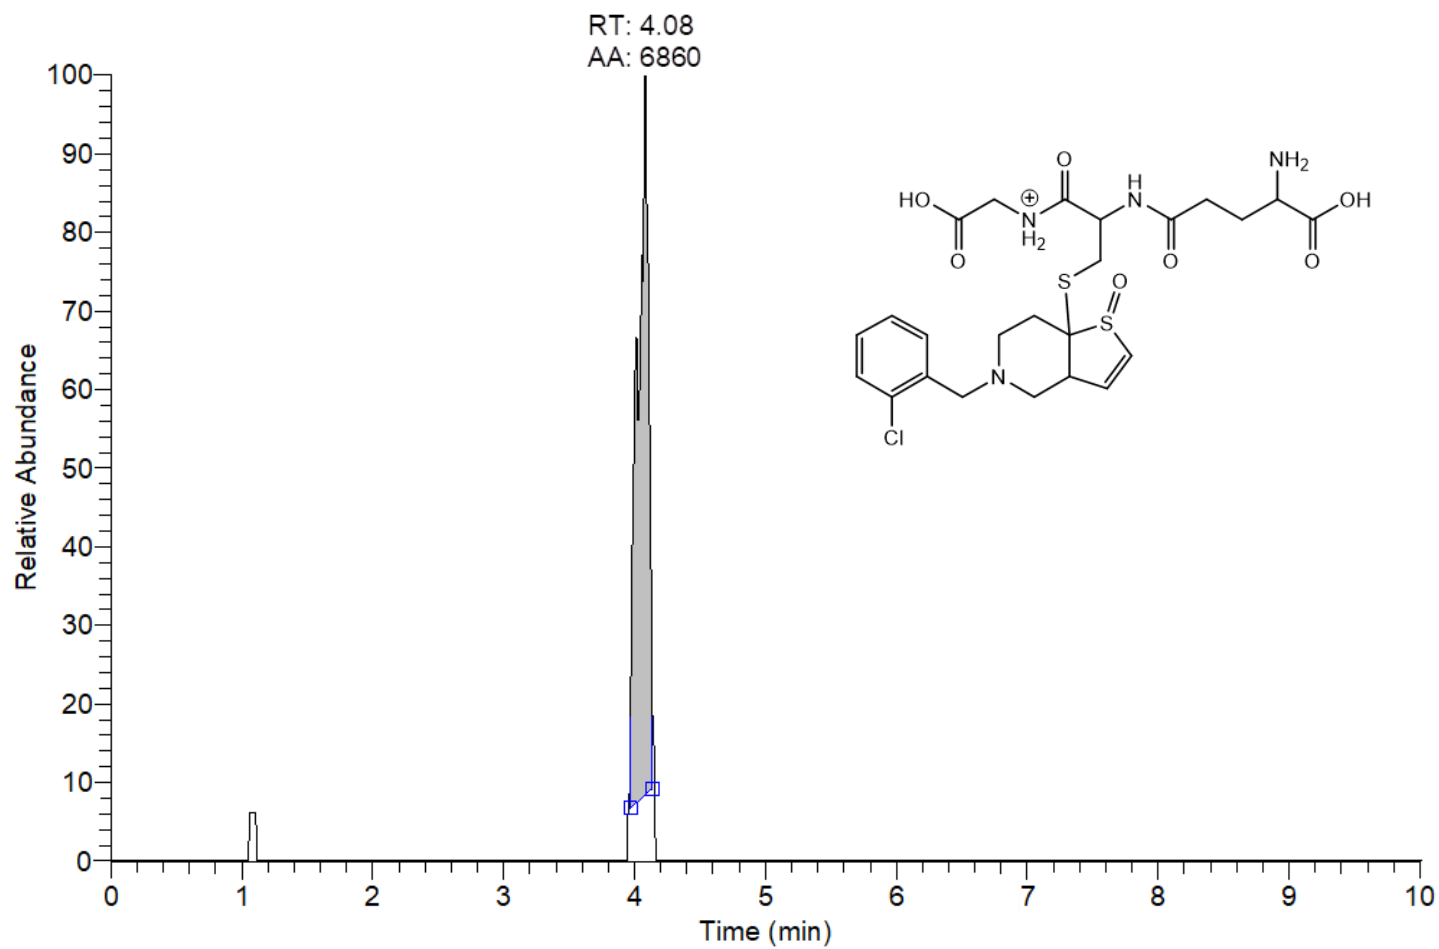

**Fig. S2** Extracted ion chromatogram of ticlopidine glutathione metabolite from ticlopidine metabolized by glutathione S-transferase (GST) after 1h incubation, presented as a GST positive control

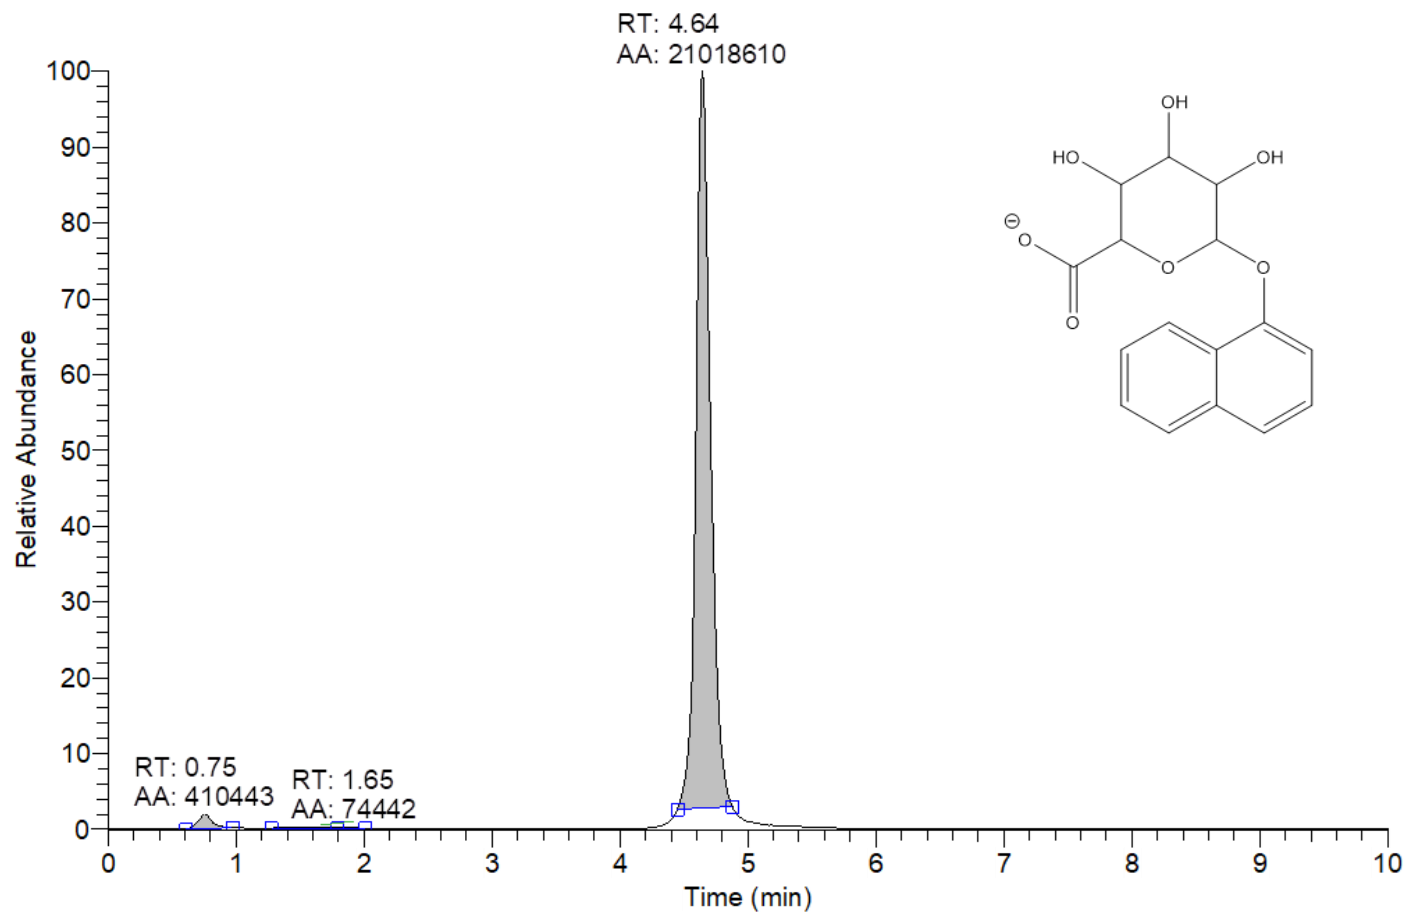

**Fig. S3** Extracted ion chromatogram of naphthol glucuronide metabolite from 1-naphthol metabolized by uridine diphosphoglucuronosyltransferase (UGT) after 15 min incubation, presented as a UGT positive control

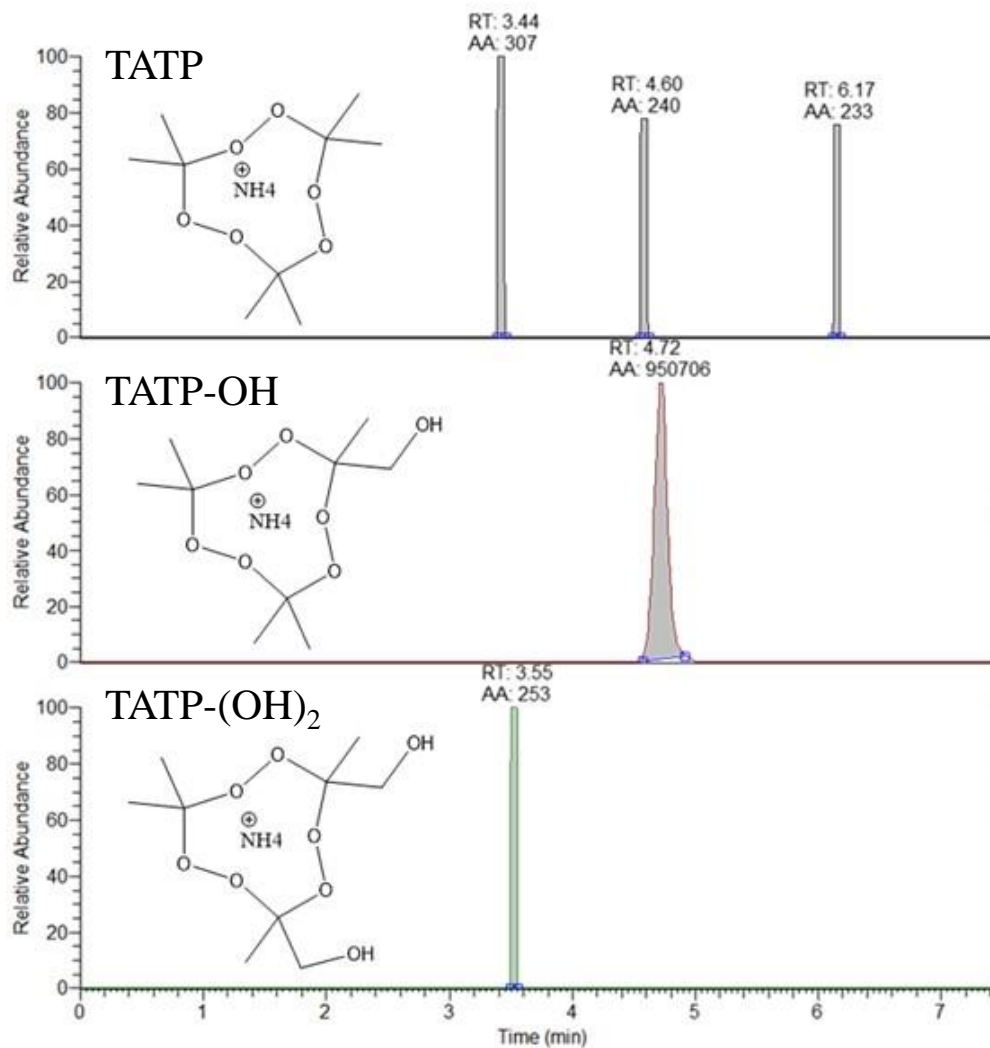

**Fig. S4** Extracted ion chromatograms of triacetone triperoxide (TATP), hydroxy-triacetone triperoxide (TATP-OH) and dihydroxy-triacetone triperoxide (TATP-(OH)<sub>2</sub>) from TATP-OH standard. No impurities were observed

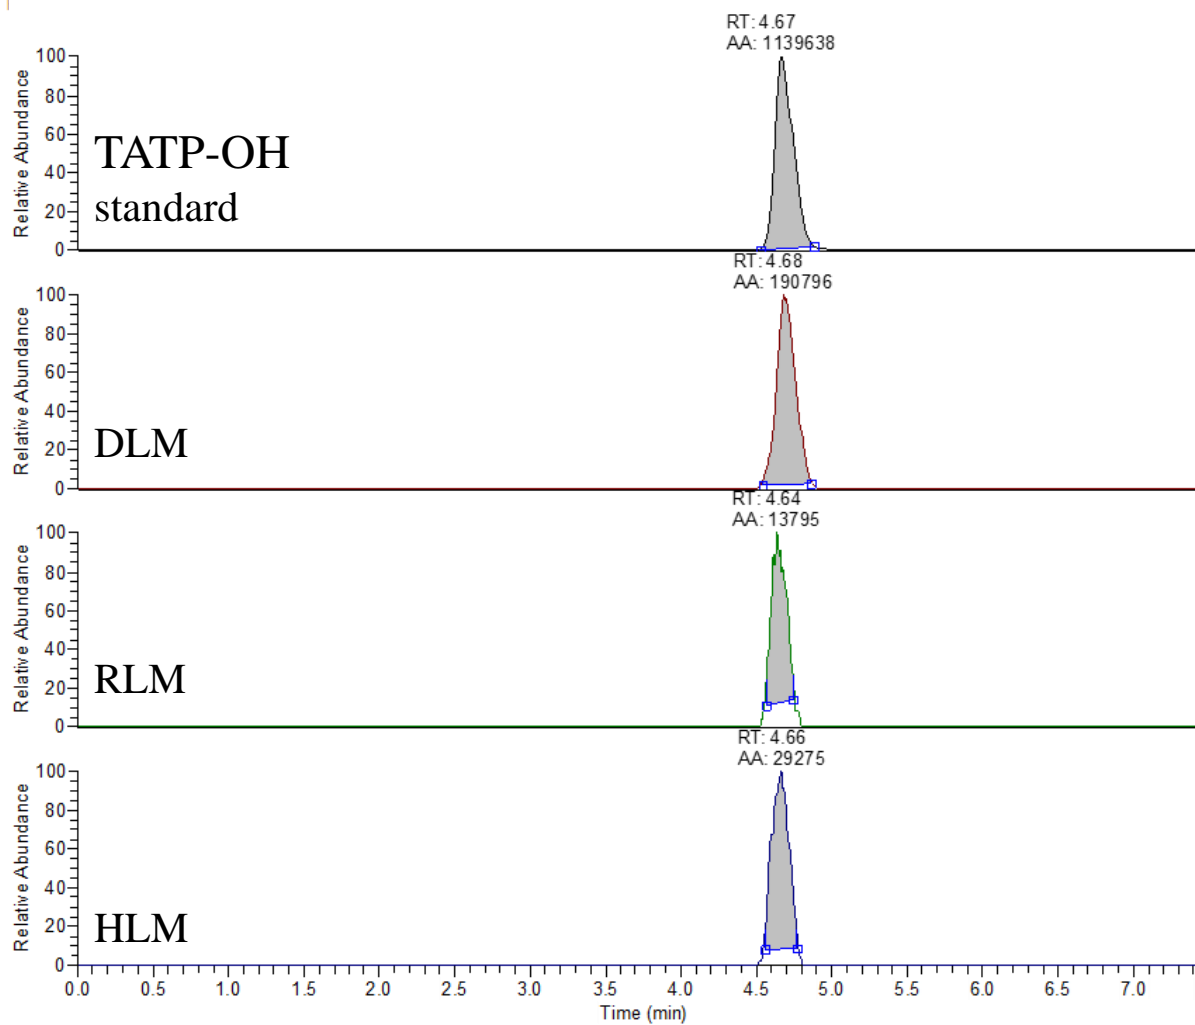

**Fig. S5** Extracted ion chromatogram of TATP-OH from TATP incubations in human liver microsomes (HLM), dog liver microsomes (DLM) and rat liver microsomes (RLM). Different species exhibit the same metabolite, TATP-OH

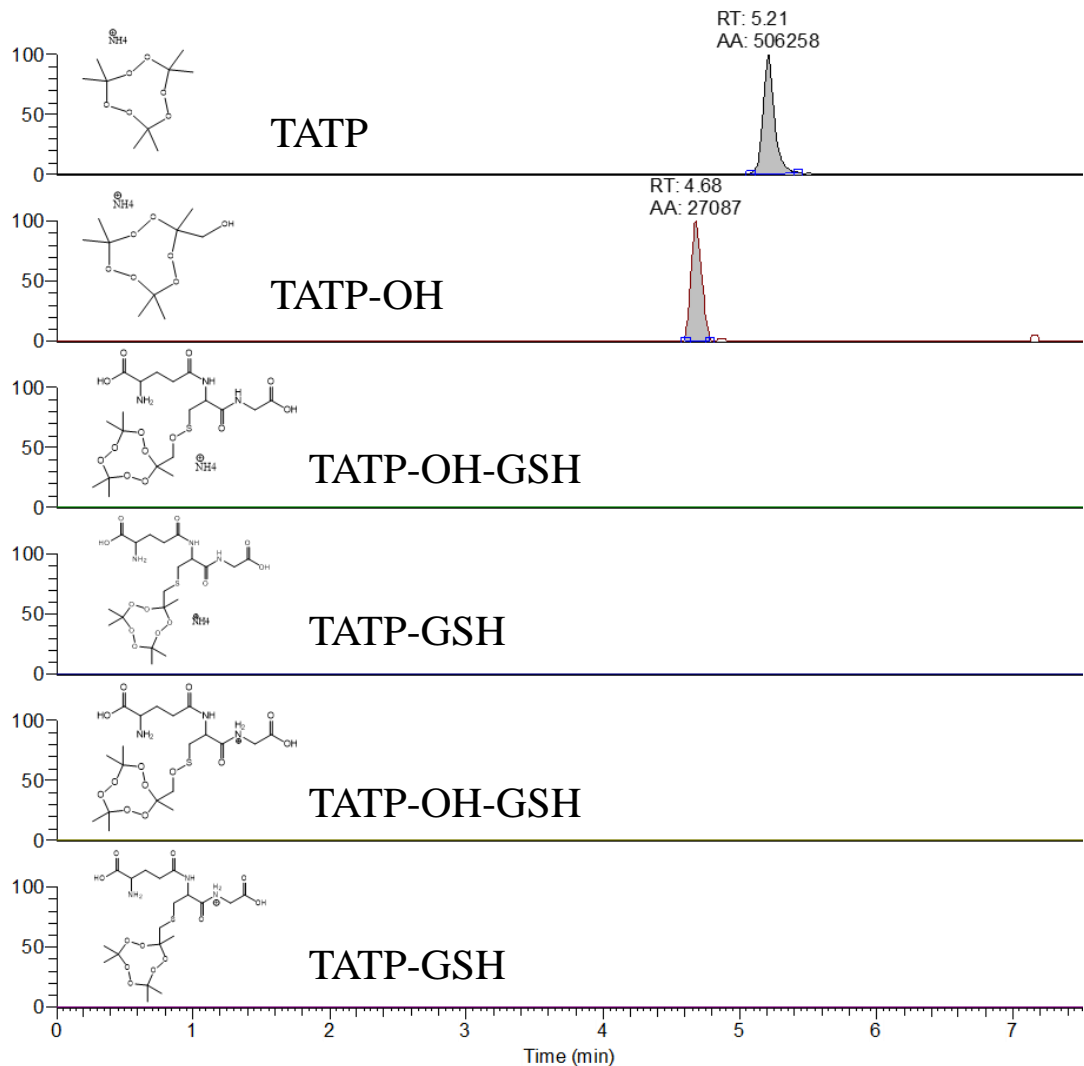

**Fig. S6** Extracted ion chromatograms using atmospheric chemical ionization in positive mode (APCI+) of possible TATP reduced glutathione (GSH) metabolites after 2h incubation.  $[M+H]^+$  and  $[M+NH_4]^+$  are illustrated, though other adducts were searched for. Other ionization methods, such as electrospray ionization (ESI) in positive and negative mode and APCI in negative mode, were also tested (not shown). No TATP-GSH metabolites were identified.

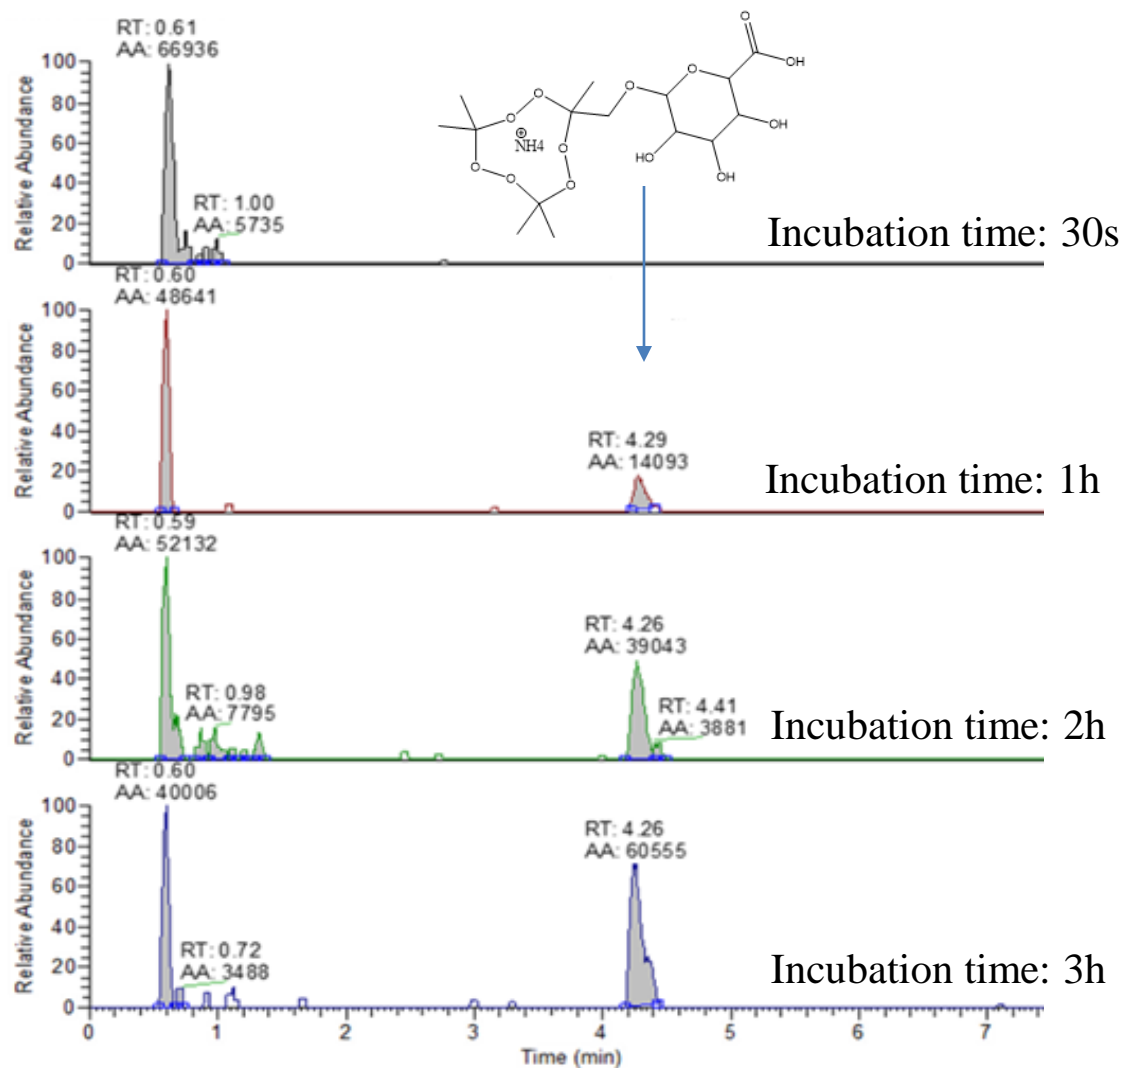

**Fig. S7** Extracted ion chromatogram of  $[\text{TATP-O-glucuronide} + \text{NH}_4]^+$  ( $m/z$  432.1712) using APCI+, showing formation of TATP-O-glucuronide at 4.26 min as incubation of TATP progressed. Glucuronidation samples were concentrated prior to high-performance liquid chromatography–high-resolution mass spectrometry (HPLC–HRMS) analysis.



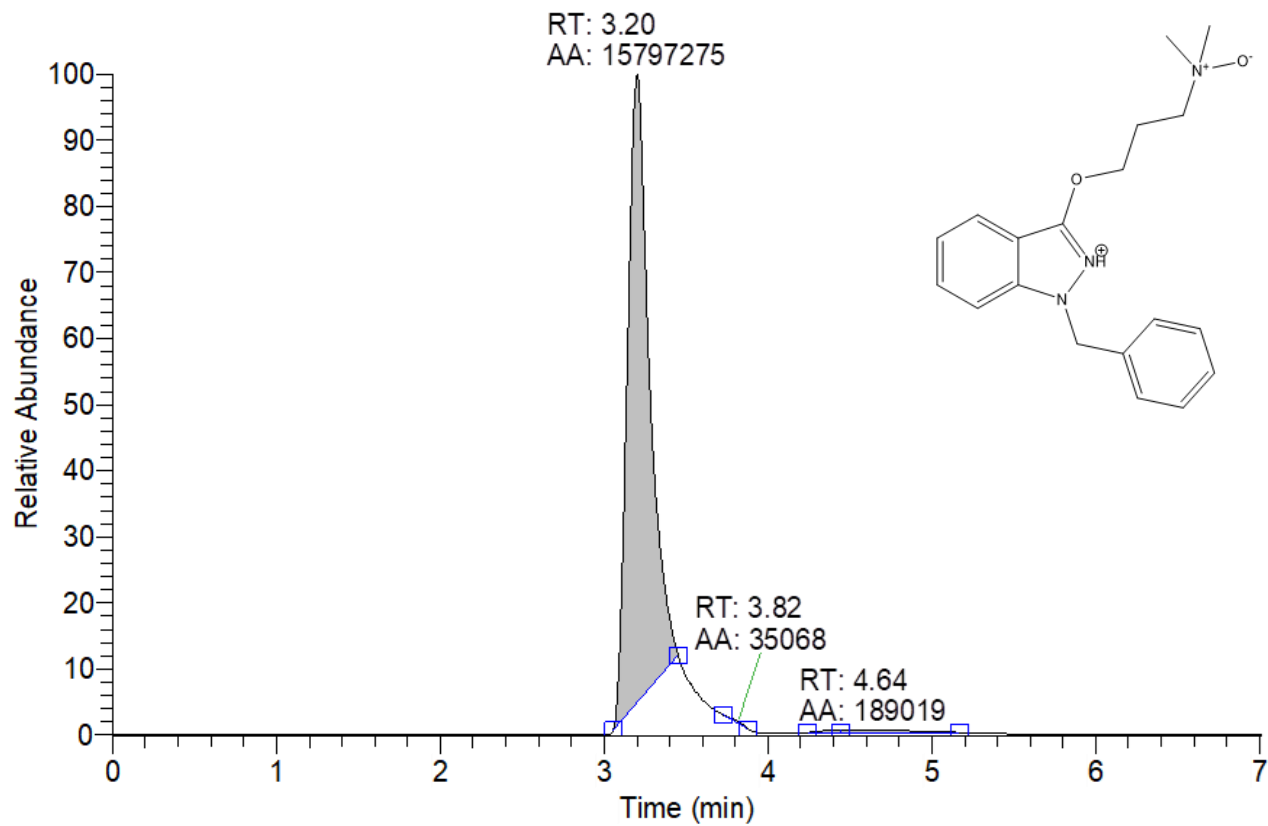

**Fig. S8** Extracted ion chromatogram of benzydamine *N*-oxide metabolite from benzydamine metabolized by recombinant flavin monooxygenase 3 (rFMO3) after 10 min incubation, presented as a rFMO positive control

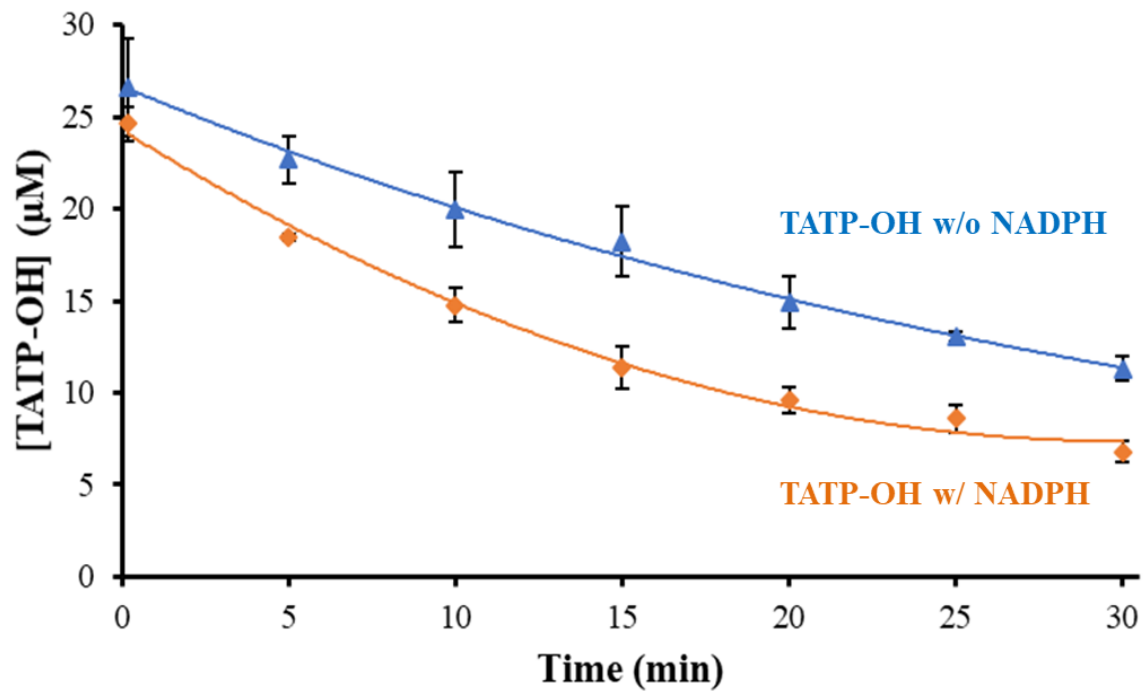

**Fig. S9** TATP-OH depletion from incubations in CYP2B6 with (w/) or without (w/o) reduced nicotinamide adenine dinucleotide phosphate (NADPH). Performed in triplicates

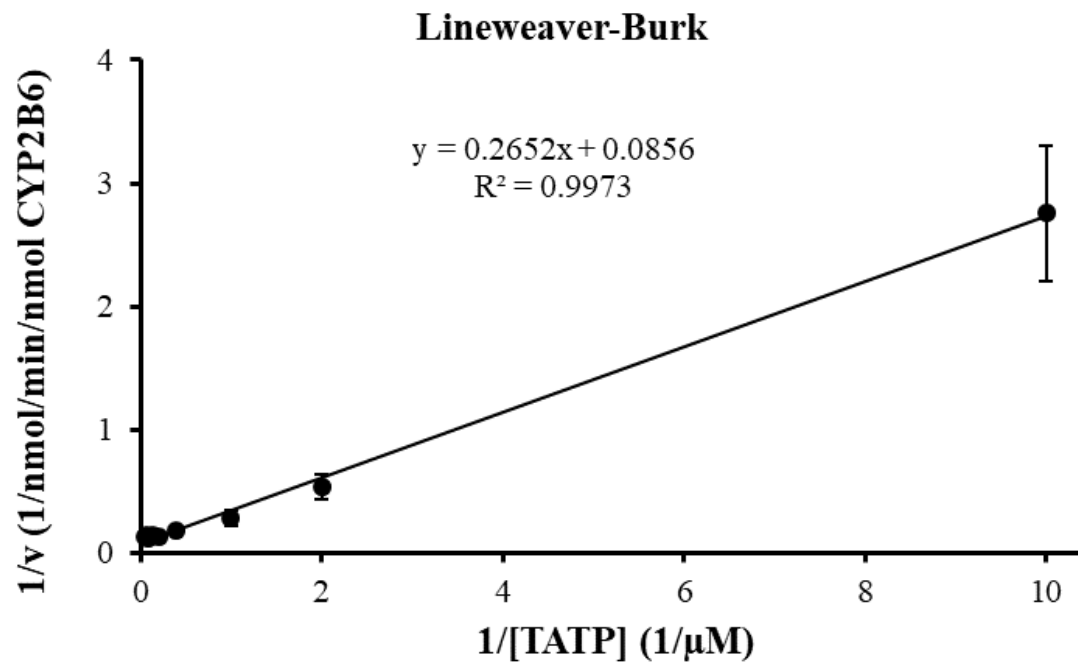

**Fig. S10** Lineweaver-Burke plot, used to fit the equation:  $1/v = (K_m/V_{max} \times 1/[S]) + 1/V_{max}$  to yield  $K_m = 3.1 \mu M$  and  $V_{max} = 11.7 \text{ nmol/min/nmol CYP2B6}$

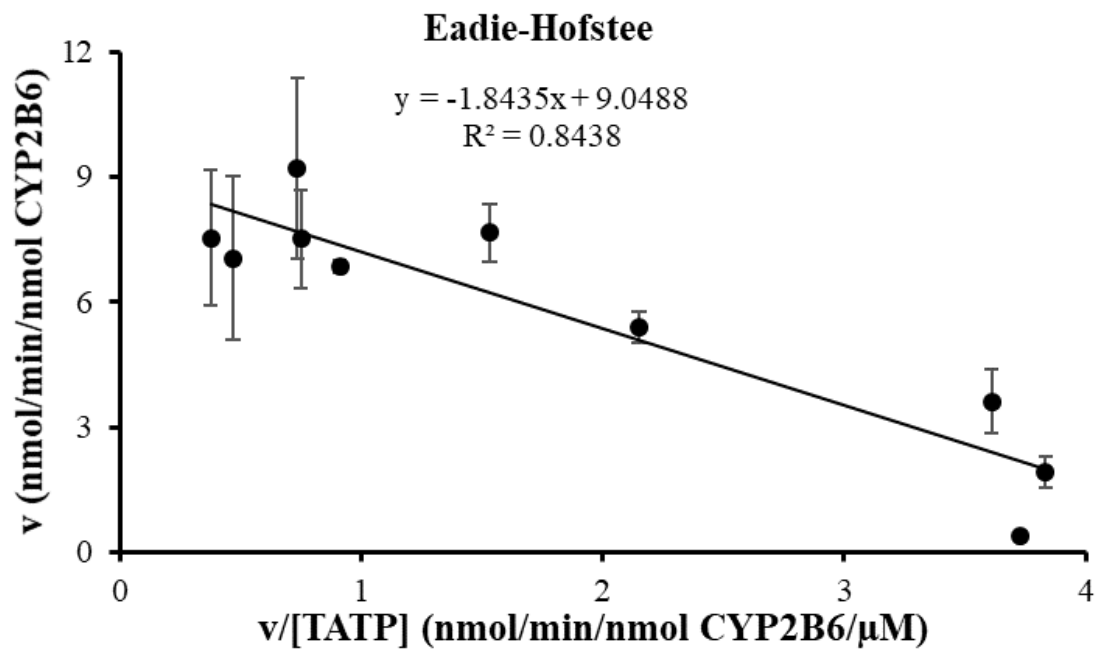

**Fig. S11** Eadie-Hofstee plot, used to fit the equation:  $v = (-K_m \times v/[S]) + V_{max}$  to yield  $K_m = 0.54 \mu\text{M}$  and  $V_{max} = 4.9$  nmol/min/nmol CYP2B6

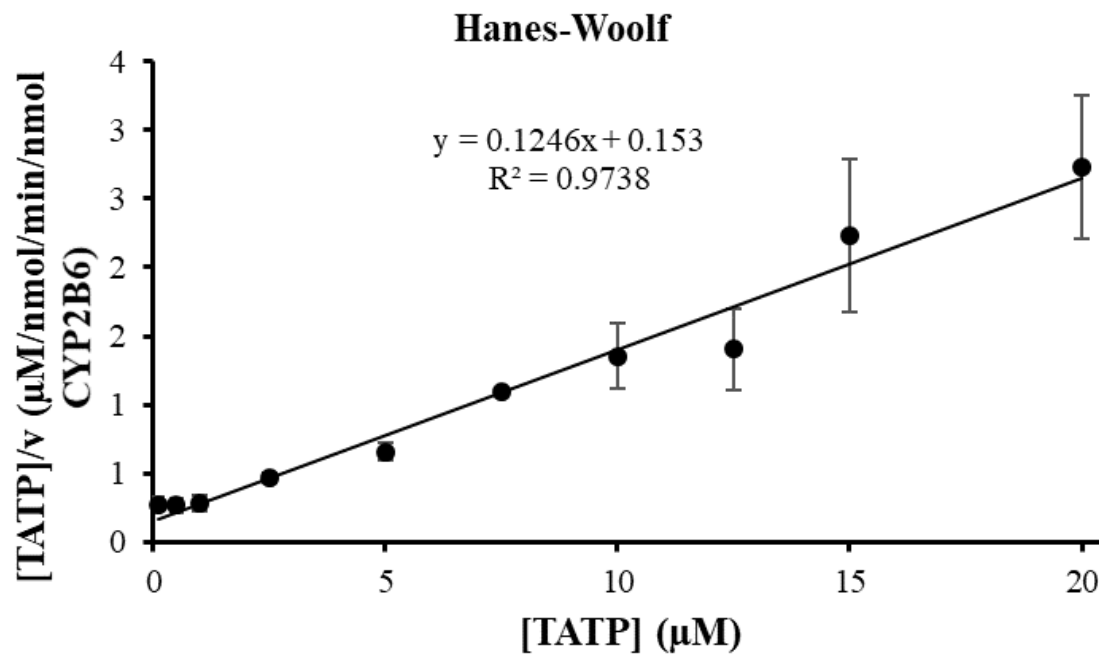

**Fig. S12** Hanes-Woolf plot, used to fit the equation:  $[S]/v = [S]/V_{\max} + K_m/V_{\max}$  to yield  $K_m = 1.2 \mu\text{M}$  and  $V_{\max} = 8.0 \text{ nmol/min/nmol CYP2B6}$

**Table S1** Hydroxy-triacetone triperoxide (TATP-OH) formation from triacetone triperoxide (TATP) incubations with recombinant cytochrome P450 (rCYP) and recombinant flavin monooxygenase (rFMO)

| Incubation matrix | [TATP-OH] ( $\mu\text{M}$ ) |
|-------------------|-----------------------------|
| HLM               | $1.47 \pm 0.07$             |
| rCYP control      | not observed                |
| rCYP1A2           | not observed                |
| rCYP2B6           | $5.59 \pm 0.3$              |
| rCYP2C9           | not observed                |
| rCYP2C19          | not observed                |
| rCYP2D6           | not observed                |
| rCYP2E1           | not observed                |
| rCYP3A4           | not observed                |
| rFMO control      | not observed                |
| rFMO1             | not observed                |
| rFMO3             | not observed                |
| rFMO5             | not observed                |

Experiments with rCYP (100 pmol CYP/mL) or rFMO (100  $\mu\text{g}$  protein/mL) consisted of 10  $\mu\text{g}/\text{mL}$  TATP incubated with 10 mM phosphate buffer (pH 7.4), 2 mM  $\text{MgCl}_2$  and 1 mM NADPH. Incubations were done in triplicates and quenched at 10 min

*HLM* human liver microsomes, *NADPH* reduced nicotinamide adenine dinucleotide phosphate

**Table S2** TATP-*O*-glucuronide formation from TATP-OH incubations with recombinant uridine diphosphoglucuronosyltransferase (rUGT).

| Incubation matrix | TATP-glucuronide/IS area count |
|-------------------|--------------------------------|
| HLM               | 0.26 ± 0.02                    |
| rUGT control      | not observed                   |
| rUGT1A1           | not observed                   |
| rUGT1A3           | not observed                   |
| rUGT1A4           | not observed                   |
| rUGT1A6           | not observed                   |
| rUGT1A9           | not observed                   |
| rUGT2B7           | 0.05 ± 0.03                    |

Experiments with rUGT (500 µg protein/mL) consisted of 10 µg/mL TATP-OH incubated with 10 mM phosphate buffer (pH 7.4), 2 mM MgCl<sub>2</sub>, 50 µg/mL alamethicin, 1 mM NADPH, and 5.5 mM UDPGA. Glucuronidation incubations were done in triplicates and quenched at 2 h. Quantification was done using area ratio TATP-*O*-glucuronide/IS. *UDPGA* uridine diphosphoglucuronic acid
